# Supplementary material for: Synthesis and Docking Studies of the NovelN-(2,2-Di(1H-pyrrol-2-yl)ethyl)adamantane-1-carboxamide, a Potential 11β-HSD1 Inhibitor
Source: Hindawi journal article supplement (doi:10.1155/2014/294246), 2014-01-01
Supplement: f1 [file 294246.f1.pdf]

Synthesis and docking studies of the novel 1-adamantyl-(N-meso-dipyrrolylmethylene)-  
carboxamide, a potential 11 $\beta$ -HSD1 inhibitor

Salvador Gallardo-Alfonzo, Ana Lilia Ocampo-Nestor, Claudia A. Contreras-Celedón  
and Luis Chacón-García \*

SI of compound **1**

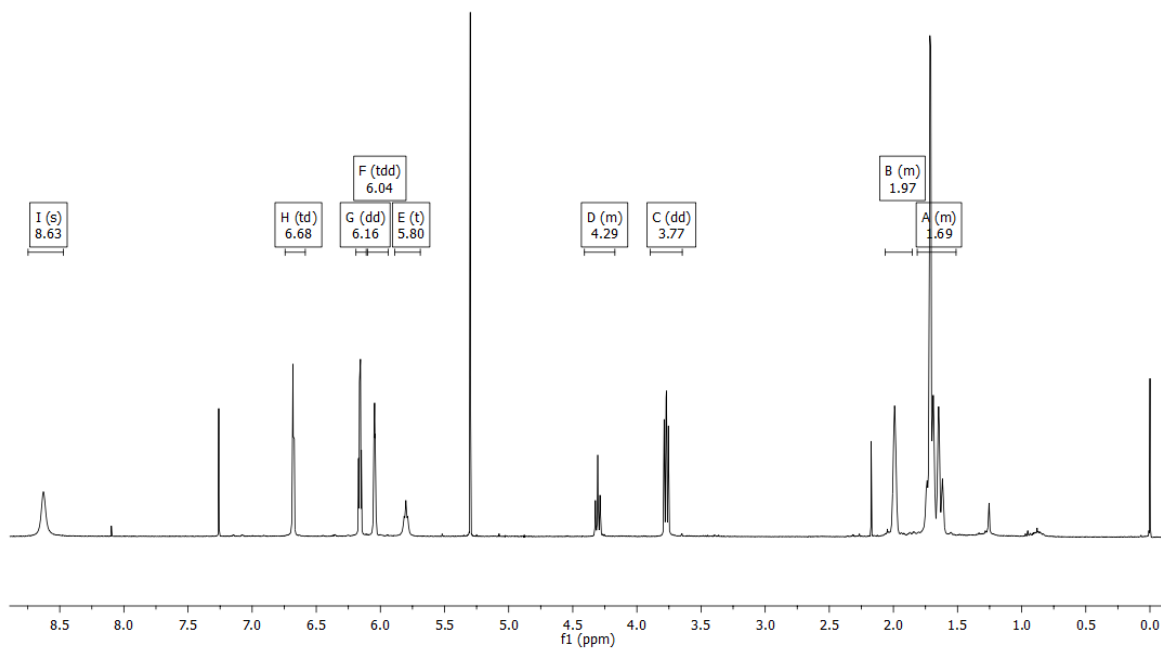

$^1\text{H}$  NMR in  $\text{CDCl}_3$  (400 MHz)

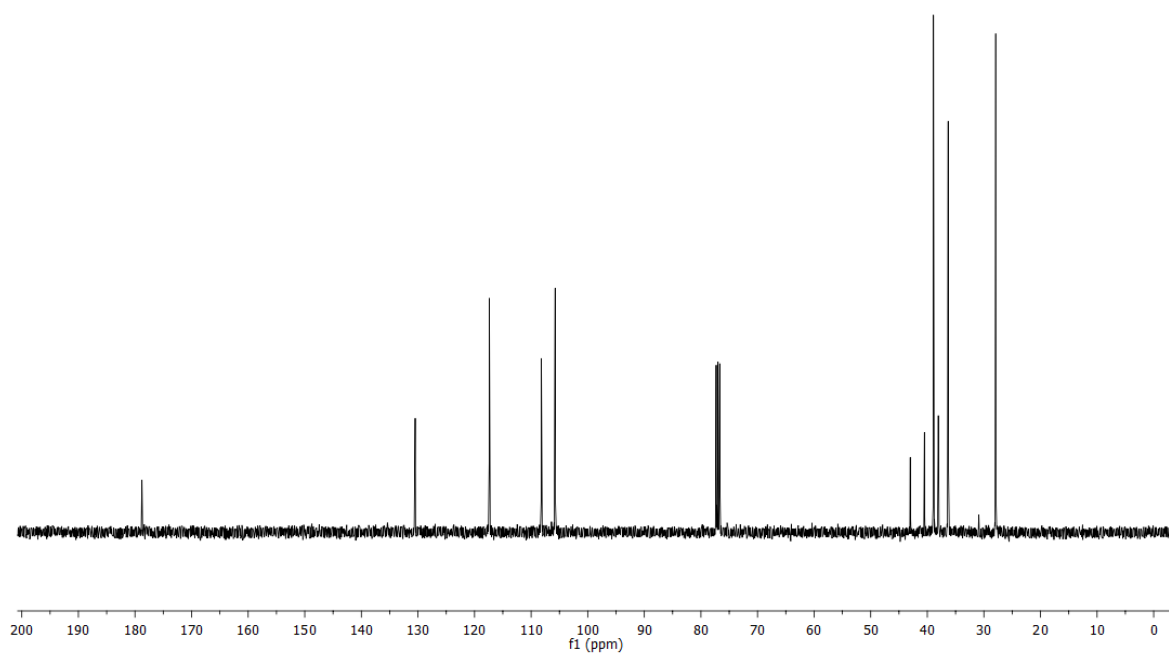

$^{13}\text{C}$  NMR in  $\text{CDCl}_3$  (100 MHz)

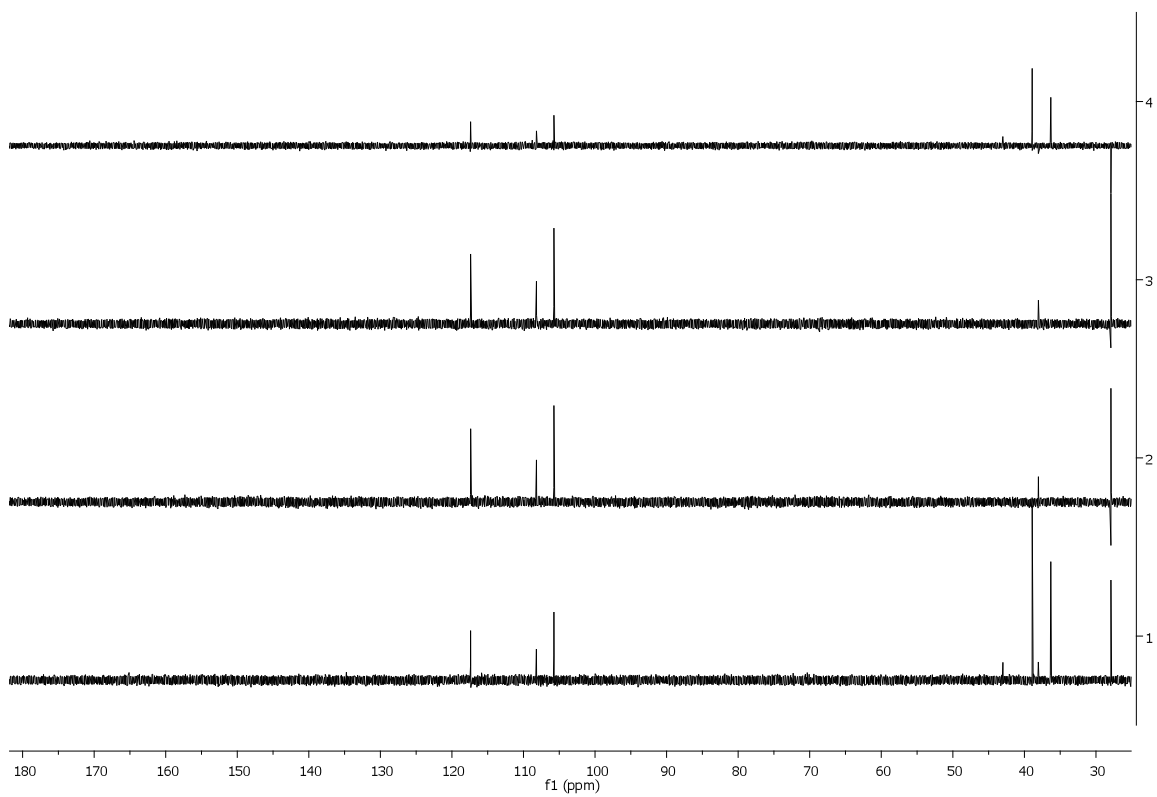

DEPT

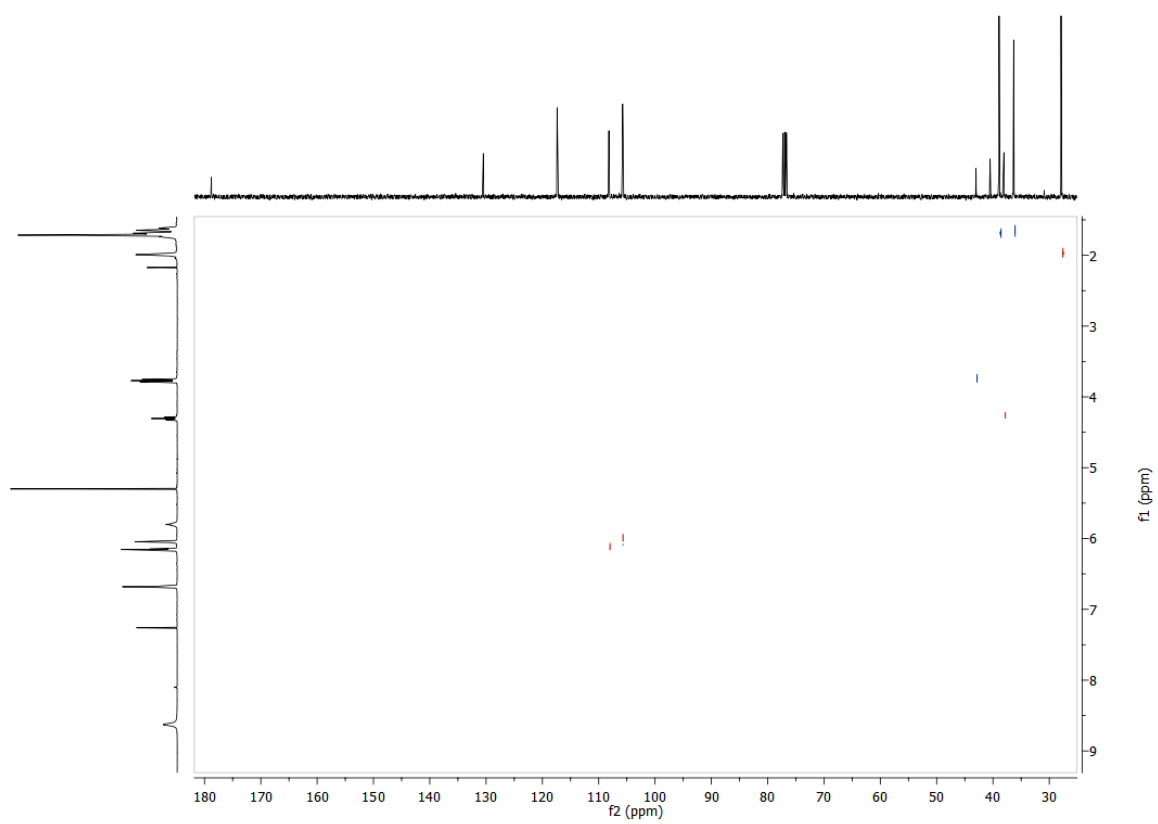

HETCOR

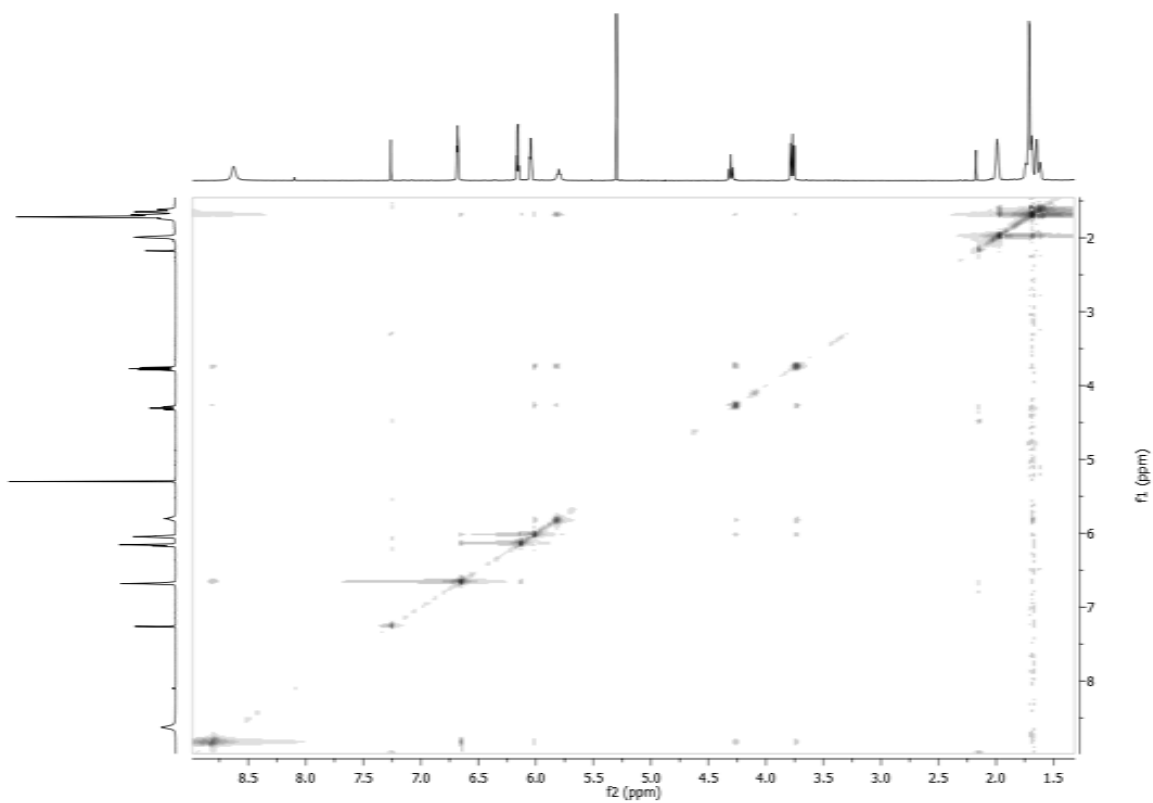

NOESY

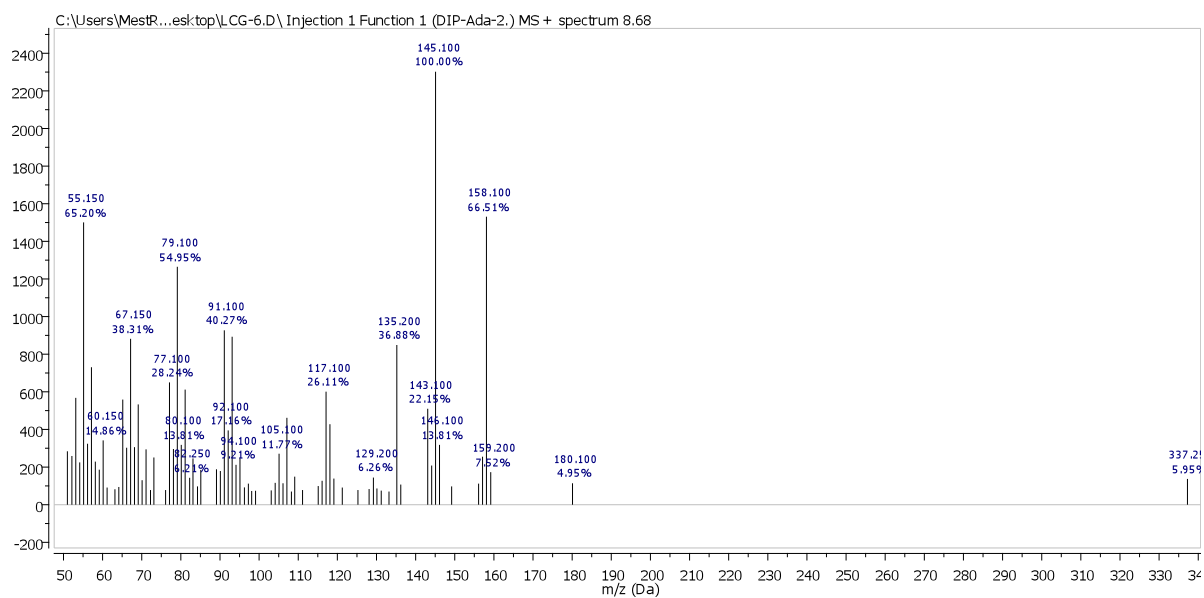

MS-EI.

[ Elemental Composition ]

Page: 1

Data : Dr-Roberto-Martinez016 Date : 07-Nov-2013 14:51  
Sample: 2381 Dipirrol-Adamantillo  
Note : -luis-velasco  
Inlet : Direct Ion Mode : FAB+  
RT : 1.31 min Scan#: (4,6)  
Elements : C 40/0, H 52/0, O 6/0, N 4/1  
Mass Tolerance : 1000ppm, 1mmu if m/z > 1  
Unsaturation (U.S.) : 8.0 - 23.0

|               |            |      |    |    |   |   |
|---------------|------------|------|----|----|---|---|
| Observed m/z  | Int%       |      |    |    |   |   |
| 338.2235      | 100.0      |      |    |    |   |   |
| Estimated m/z | Error[ppm] | U.S. | C  | H  | O | N |
| 338.2232      | +0.8       | 9.5  | 21 | 28 | 1 | 3 |

HRMS
